# Supplementary material for: Integrated Metabolomics and Transcriptomics Suggest the Global Metabolic Response to 2-Aminoacrylate Stress in Salmonella enterica
Source: MDPI journal article supplement (doi:10.3390/metabo10010012), 2019-12-24
Supplement: s1 [file s1]

# **Integrated metabolomics and transcriptomics suggest the global metabolic response to 2-aminoacrylate stress in *Salmonella enterica***

Andrew J. Borchert<sup>1</sup>, Jacquelyn M. Walejko<sup>2</sup>, Adrien Le Guennec<sup>3</sup>, Dustin C. Ernst<sup>4</sup>, Arthur S. Edison<sup>5</sup>, and Diana M. Downs<sup>6\*</sup>

Department of Microbiology, University of Georgia, Athens, GA 30602

- <sup>1</sup> Department of Microbiology, University of Georgia, Athens, GA 30602, USA; Current Address: National Bioenergy Center, National Renewable Energy Laboratory, Golden, CO 90401, USA; [aborch@uga.edu](mailto:aborch@uga.edu)
  - <sup>2</sup> Department of Biochemistry & Molecular Biology, Complex Carbohydrate Research Center, University of Georgia, Athens, GA 30602, USA; Current Address: Duke Molecular Physiology Institute, Duke University, Durham, NC 27701, USA; [jacquelyn.walejko@duke.edu](mailto:jacquelyn.walejko@duke.edu)
  - <sup>3</sup> Department of Biochemistry & Molecular Biology, Complex Carbohydrate Research Center, University of Georgia, Athens, GA 30602, USA; Current Address: Centre for Biomolecular Spectroscopy and Randal Division of Cell and Molecular Biophysics, King's College London, New Hunt's House, London, SE1 1UL, United Kingdom; [adrien.le\\_guennec@kcl.ac.uk](mailto:adrien.le_guennec@kcl.ac.uk)
  - <sup>4</sup> Department of Microbiology, University of Georgia, Athens, GA 30602, USA; Current Address: Center for Circadian Biology, University of California, San Diego, CA 92161, USA; [dernst@ucsd.edu](mailto:dernst@ucsd.edu)
  - <sup>5</sup> Departments of Genetics and Biochemistry & Molecular Biology, Institute of Bioinformatics, Complex Carbohydrate Research Center, University of Georgia, Athens, GA 30602, USA; [aedison@uga.edu](mailto:aedison@uga.edu)
  - <sup>6</sup> Department of Microbiology, University of Georgia, Athens, GA 30602, USA; [dmdowns@uga.edu](mailto:dmdowns@uga.edu)
- \* Correspondence: [dmdowns@uga.edu](mailto:dmdowns@uga.edu); Tel.: +1-706-542-9573

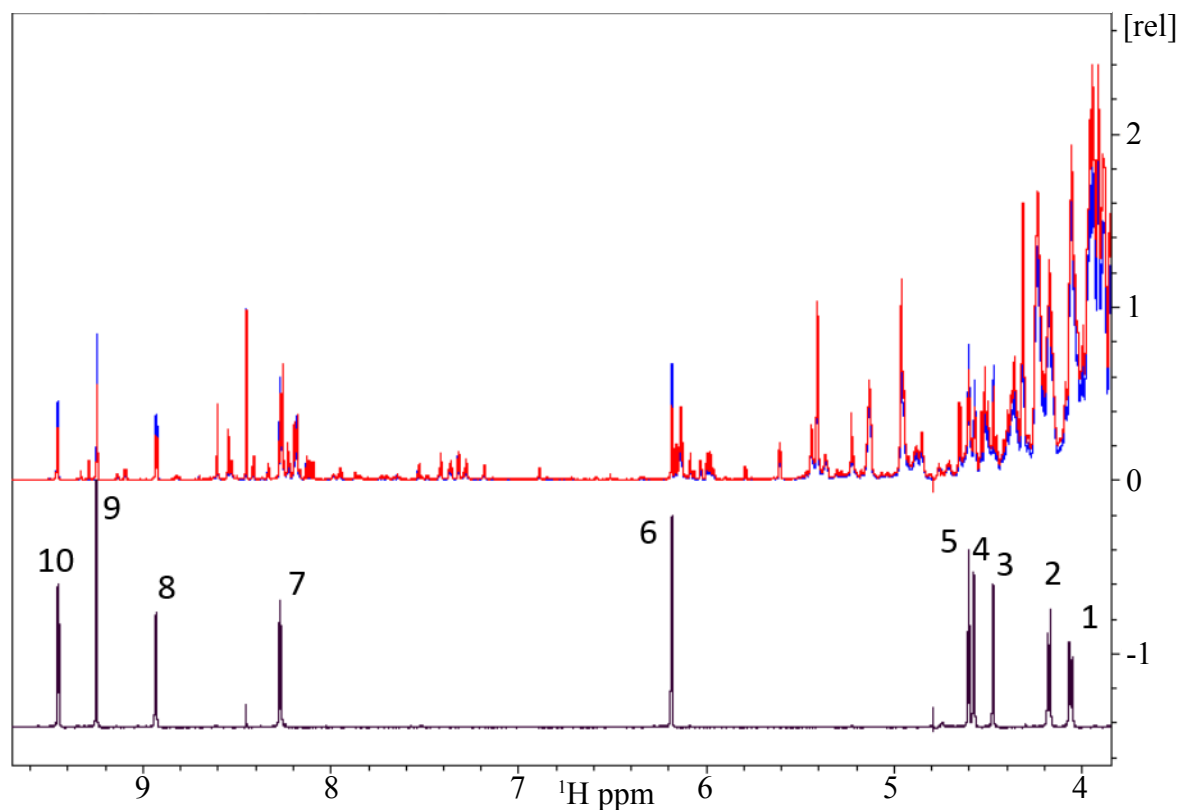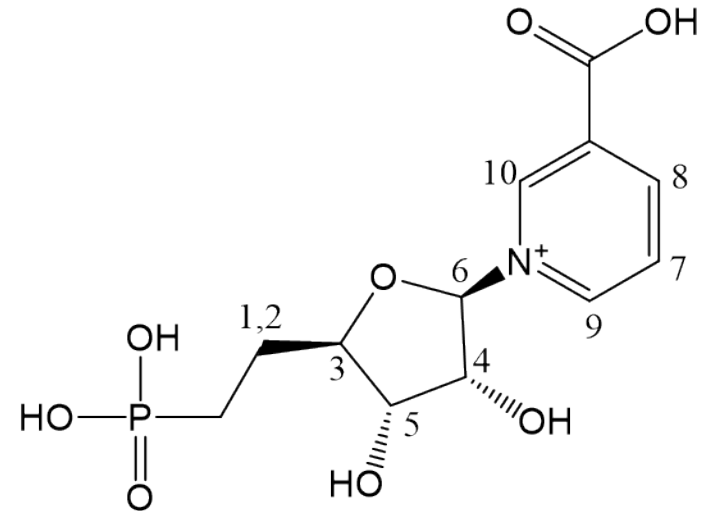

Nicotinate mononucleotide (NMN)

| Atom | <sup>1</sup> H peak | <sup>13</sup> C peak |
|------|---------------------|----------------------|
| 1    | 4.05                | 65.87                |
| 2    | 4.17                | 65.87                |
| 3    | 4.47                | 73.59                |
| 4    | 4.57                | 90.34                |
| 5    | 4.6                 | 80.36                |
| 6    | 6.18                | 102.75               |
| 7    | 8.27                | 131.26               |
| 8    | 8.93                | 149.55               |
| 9    | 9.25                | 144.39               |
| 10   | 9.45                | 143.93               |

**Figure S1. Nicotinate mononucleotide identification by sample spiking.** The <sup>1</sup>H NMR spectrum was obtained for the pooled metabolite extraction samples with (blue line) and without (red line) the inclusion of 150 μM pure NMN standard. The <sup>1</sup>H NMR spectra of NMN alone is provided below (black line). Labeled peaks correspond to labeled atoms on the structural diagram. Exact <sup>1</sup>H NMR and <sup>13</sup>C peak assignments are listed in the adjacent table.

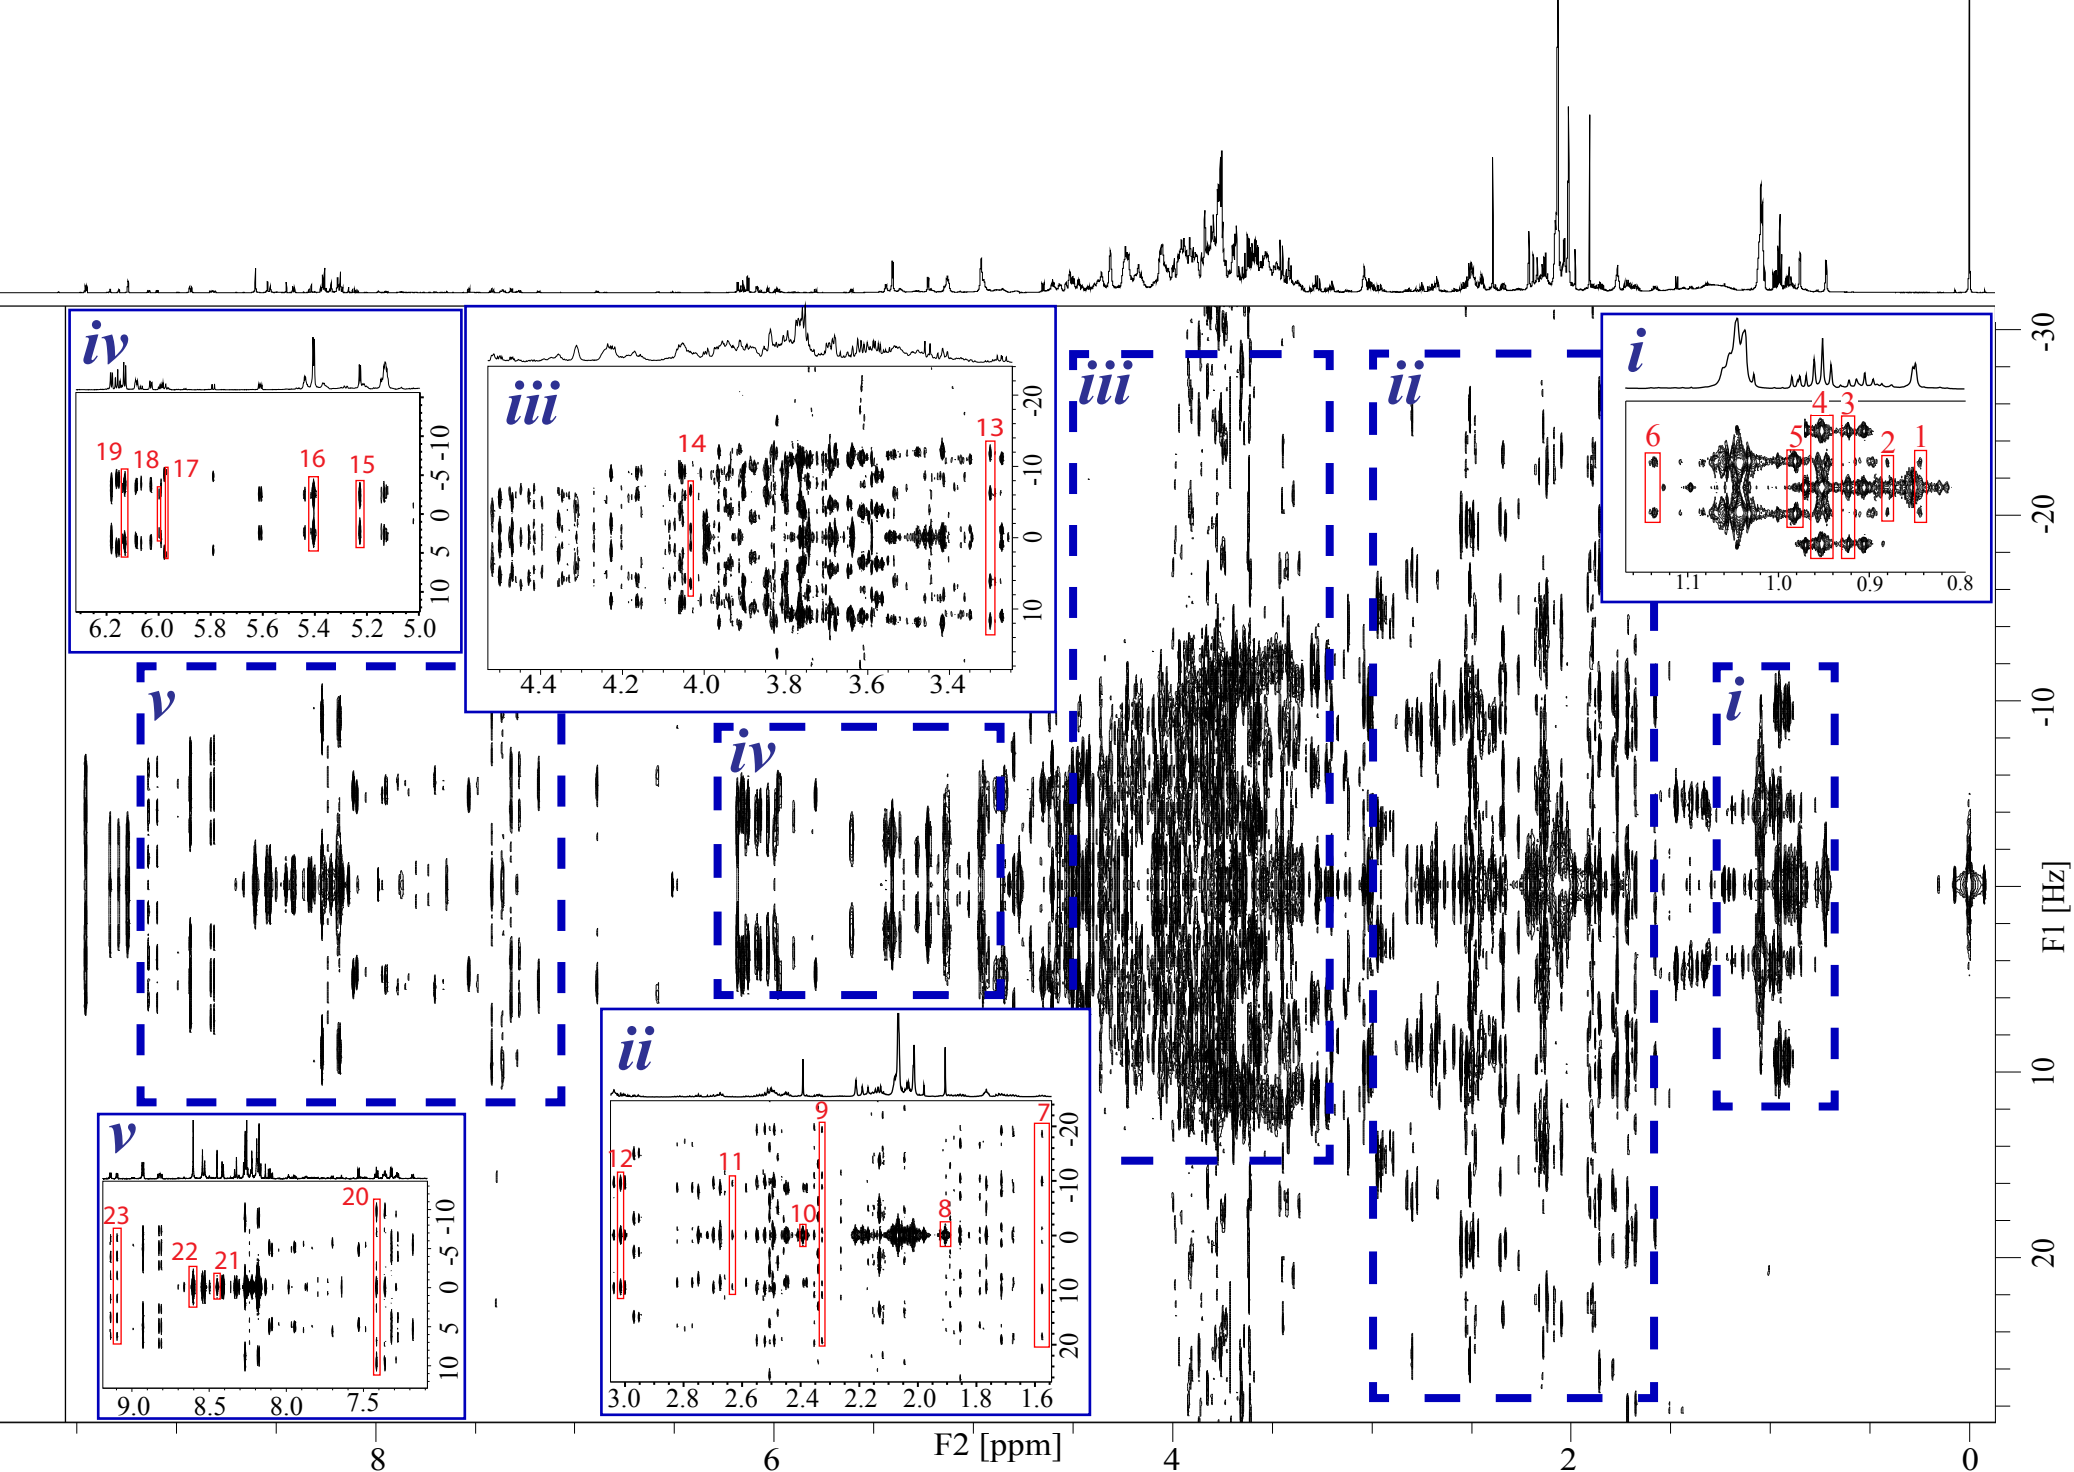

**Figure S2. Representative 2D J-RES Spectrum.** Features outlined with red boxes were used for quantification: 1) 2-isopropylmalic acid, 2) Pantothenic acid, 3) Ile, 4) Leu, 5) Val, 6) Thr, 7) N-acetylputrescine, 8) Acetate, 9) Glu, 10) Succinate, 11) Met, 12) Lys, 13) GSSG, 14) Ser, 15) Glucose, 16) Maltose, 17) UTP, 18) CMP, 19) dCMP, 20) Phe, 21) Formate, 22) AMP, 23) NAD
